# Supplementary material for: The Genomics Education Partnership: Successful Integration of Research into Laboratory Classes at a Diverse Group of Undergraduate Institutions
Source: Atypon-hosted journal article supplement (doi:10.1187/09-11-0087), 2010-03-01
Supplement: supp.pdf [file supp.pdf]

## **Supplemental Tables:**

Supplemental tables S1 and S2 are being hosted by the GEP, are constantly being updated and are available online:

S1:

[http://gep.wustl.edu/wiki/index.php/Faculty\\_Statements:\\_Impact\\_of\\_GEP\\_on\\_Students](http://gep.wustl.edu/wiki/index.php/Faculty_Statements:_Impact_of_GEP_on_Students)

S2:

[http://gep.wustl.edu/wiki/index.php/Faculty\\_Statements:\\_Lessons\\_Learned\\_During\\_Implementation](http://gep.wustl.edu/wiki/index.php/Faculty_Statements:_Lessons_Learned_During_Implementation)
